# Supplementary material for: Decidual-Placental Immune Landscape During Syngeneic Murine Pregnancy
Source: PubMed Central journal article supplement (PMC6156255; doi:10.3389/fimmu.2018.02087), 2018-09-19
Supplement: Data_Sheet_1.pdf [file Data_Sheet_1.pdf]

## *Supplementary Material*

# **Decidual-placental Immune Landscape During Syngeneic Murine Pregnancy**

Yan Li<sup>1</sup>, Gladys E. Lopez<sup>1</sup>, Jessica Vazquez<sup>1</sup>, Yan Sun<sup>2,3</sup>, Melina Chavarria<sup>1</sup>,

Payton N. Lindner<sup>1</sup>, Samantha Fredrickson<sup>1</sup>, Nathan Karst<sup>1</sup>, Aleksandar K. Stanic<sup>1,3,\*</sup>

Division of <sup>1</sup>Reproductive Sciences, <sup>2</sup>Reproductive Endocrinology and Infertility, Department of Obstetrics and Gynecology, University of Wisconsin-Madison, Madison, WI

<sup>3</sup>Reproductive Medicine Center, Fujian Provincial Maternity and Children's Hospital, Affiliated Hospital of Fujian Medical University.

### **\*Corresponding authors:**

Aleksandar K. Stanic (stanickostic@wisc.edu)

202 S Park St,  
Perinatal Research Laboratories,  
Meriter Atrium B,  
Madison, WI 53715

Email: stanickostic@wisc.edu

## *Supplementary Data*

### **Phenotype differentiation among different subsets of DCs**

To further distinguish to the phenotype of DCs subsets, we identified three subpopulations of DCs, plasmacytoid ( $\text{lin1-I-A/I-E}^+\text{B220}^+$ ),  $\text{CD8}\alpha^+$  ( $\text{lin1-CD11c}^+\text{I-A/I-E}^+\text{B220}^{\text{neg}}\text{CD11b}^{\text{neg}}\text{CD8}\alpha^+$ ), myeloid DCs in uterine, decidua and placenta tissue across the pregnancy, as well as spleen, Peyer's patches and thymus (Supplementary Fig. 2). We found that in the spleen, BST2 expression is much higher in plasmacytoid DCs subpopulation, compared with  $\text{CD8}^+$  DCs and Myeloid DCs in spleen, Peyer's patches, thymus, conforming the variant phenotype of the three subpopulations within DCs.

# Supplementary FIGURE 1

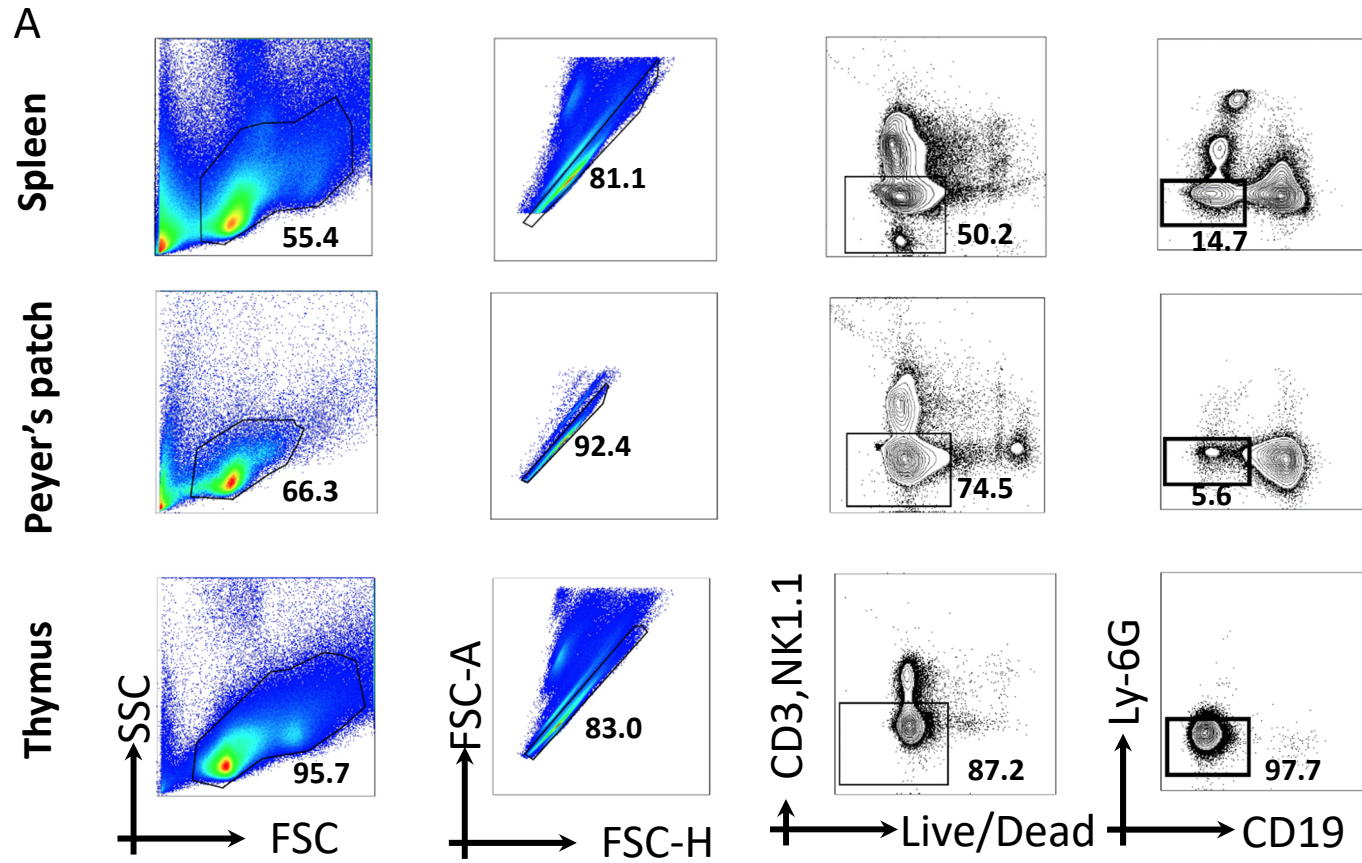

# Supplementary FIGURE 1

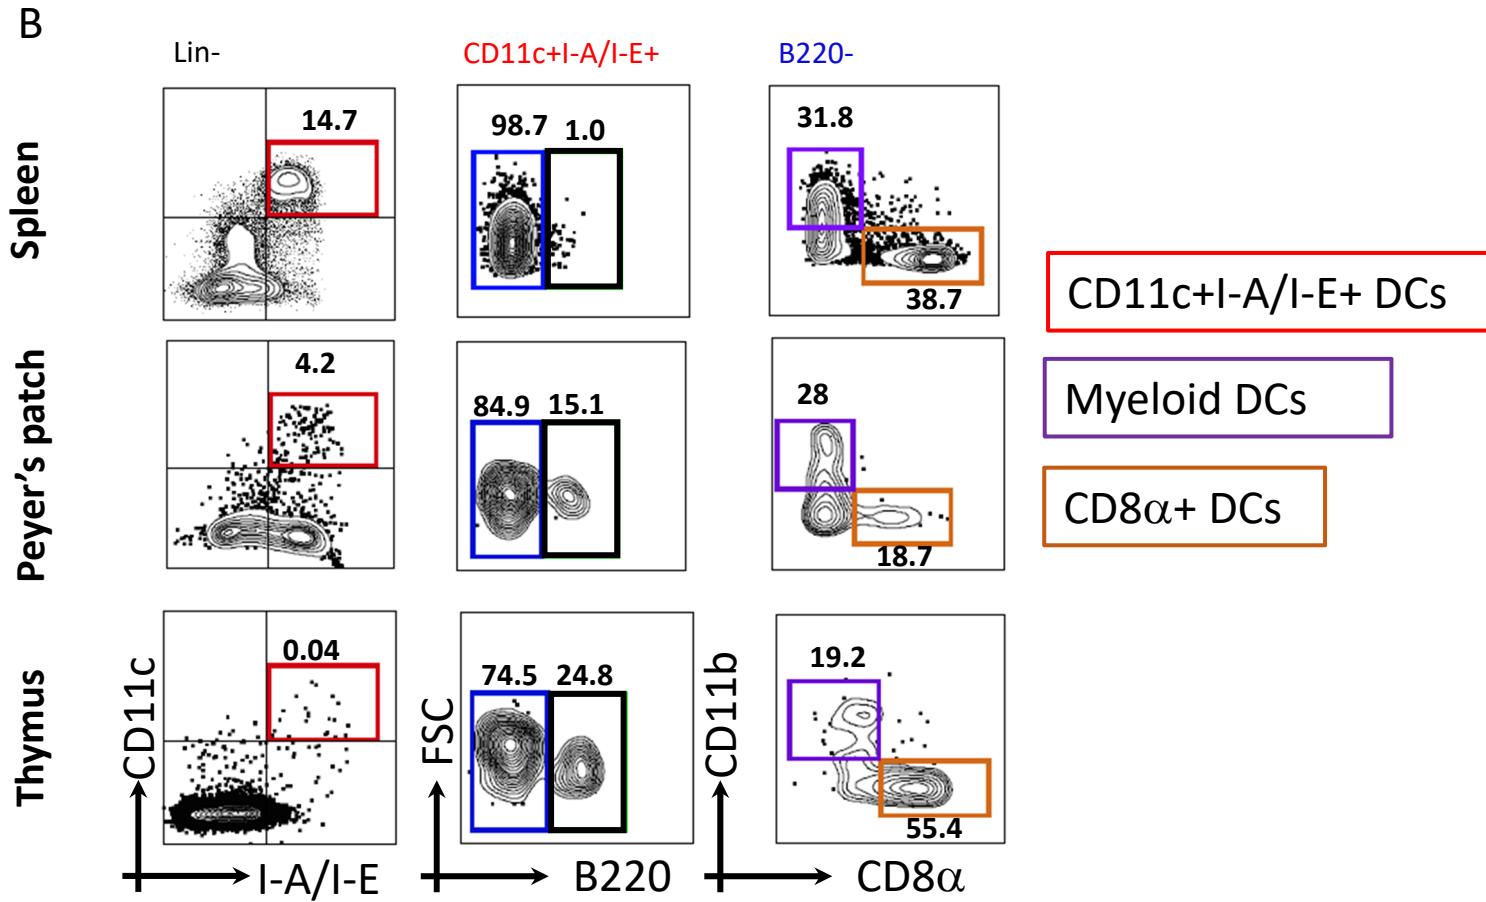



# Supplementary FIGURE 1

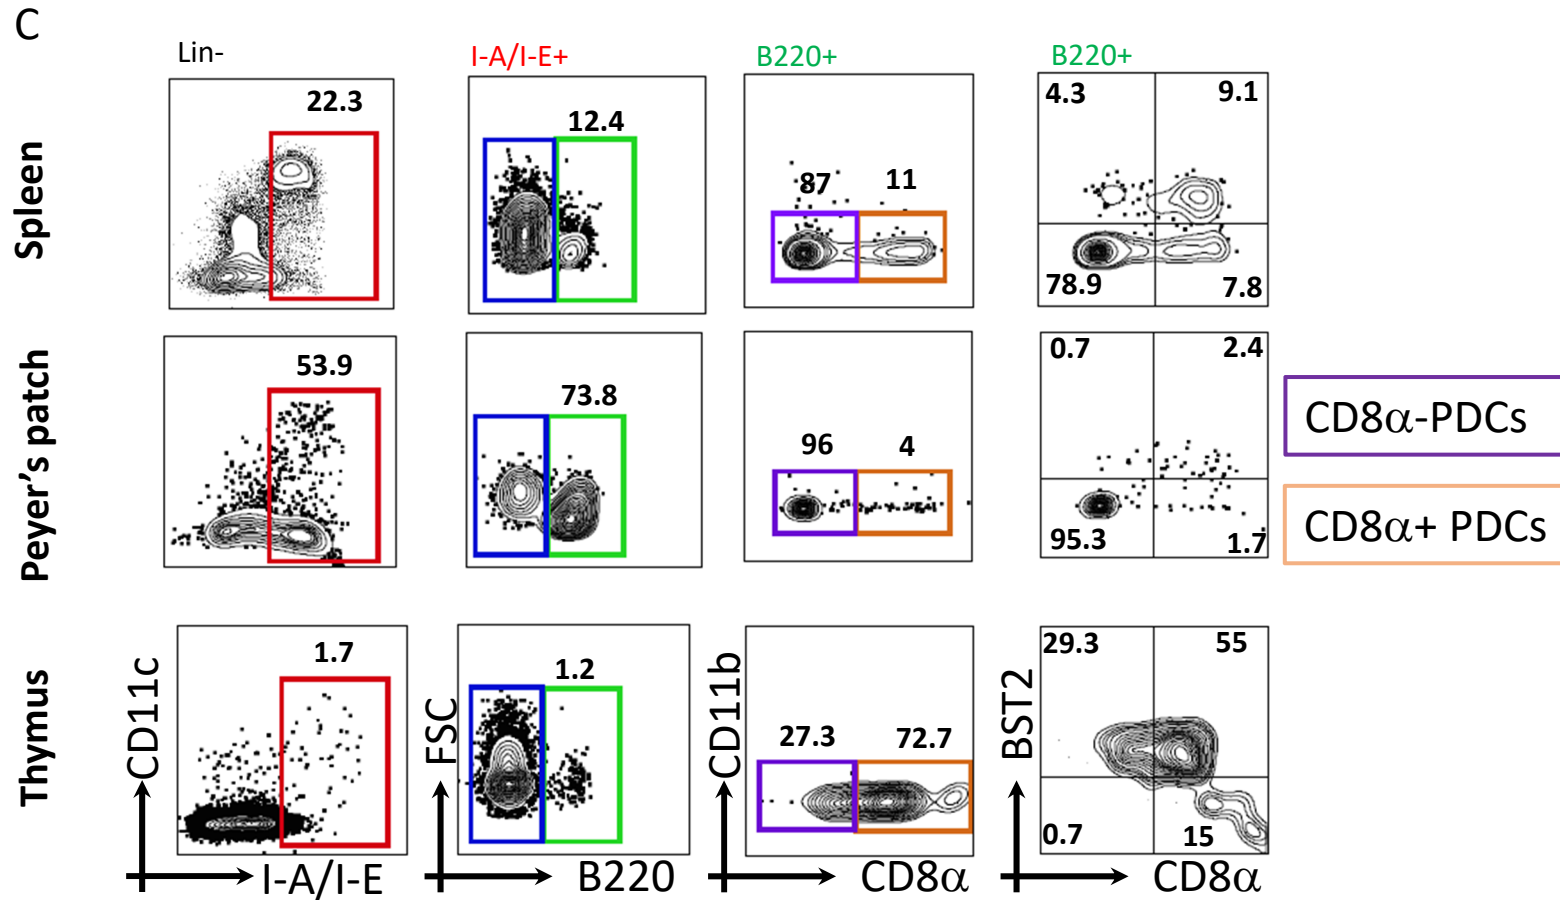

**Supplementary FUGURE 1** | Flow cytometry gating strategy of dendritic cells in spleen, Peyer's patches, and thymus. **(A)** Gating strategy of  $lin1-(CD3^{neg}NK1.1^{neg}Ly6-G^{neg}CD19^{neg})$  in spleen, Peyer's patches, and thymus. **(B)** Gating strategy of  $CD11c+I-A/I-E+DCs$  and subsets, myeloid DCs ( $B220^{neg}CD11b^{+}CD8\alpha^{neg}$ ), and  $CD8+DCs$  ( $B220^{neg}CD11b^{neg}CD8\alpha^{+}$ ) in spleen, Peyer's patches, and thymus. **(c)** Gating strategy of  $CD8\alpha+/- PDCs$  ( $I-A/I-E^{+}B220^{+}$ ) in spleen, Peyer's patches, and thymus.

# Supplementary FIGURE. 2

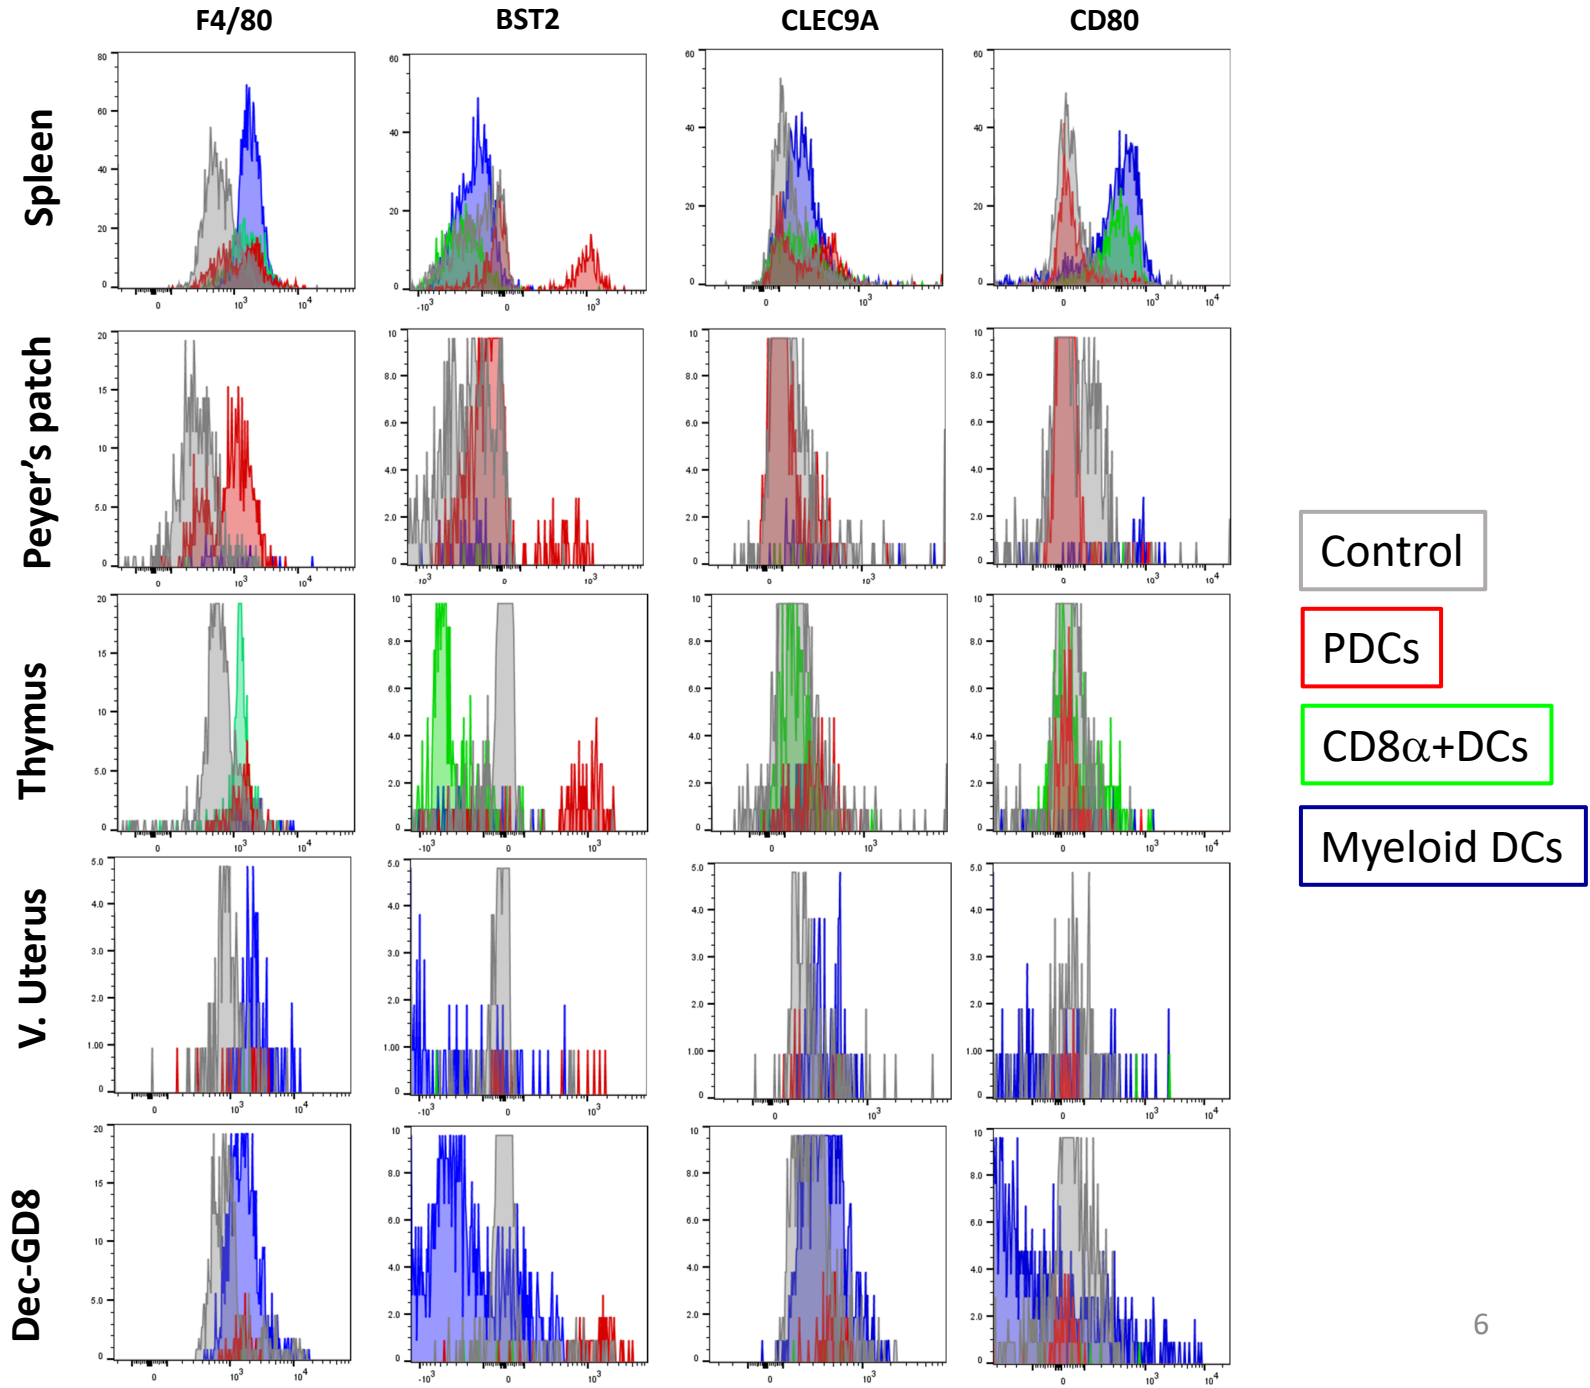

- Control
- PDCs
- CD8α+DCs
- Myeloid DCs

## Supplementary FIGURE. 2

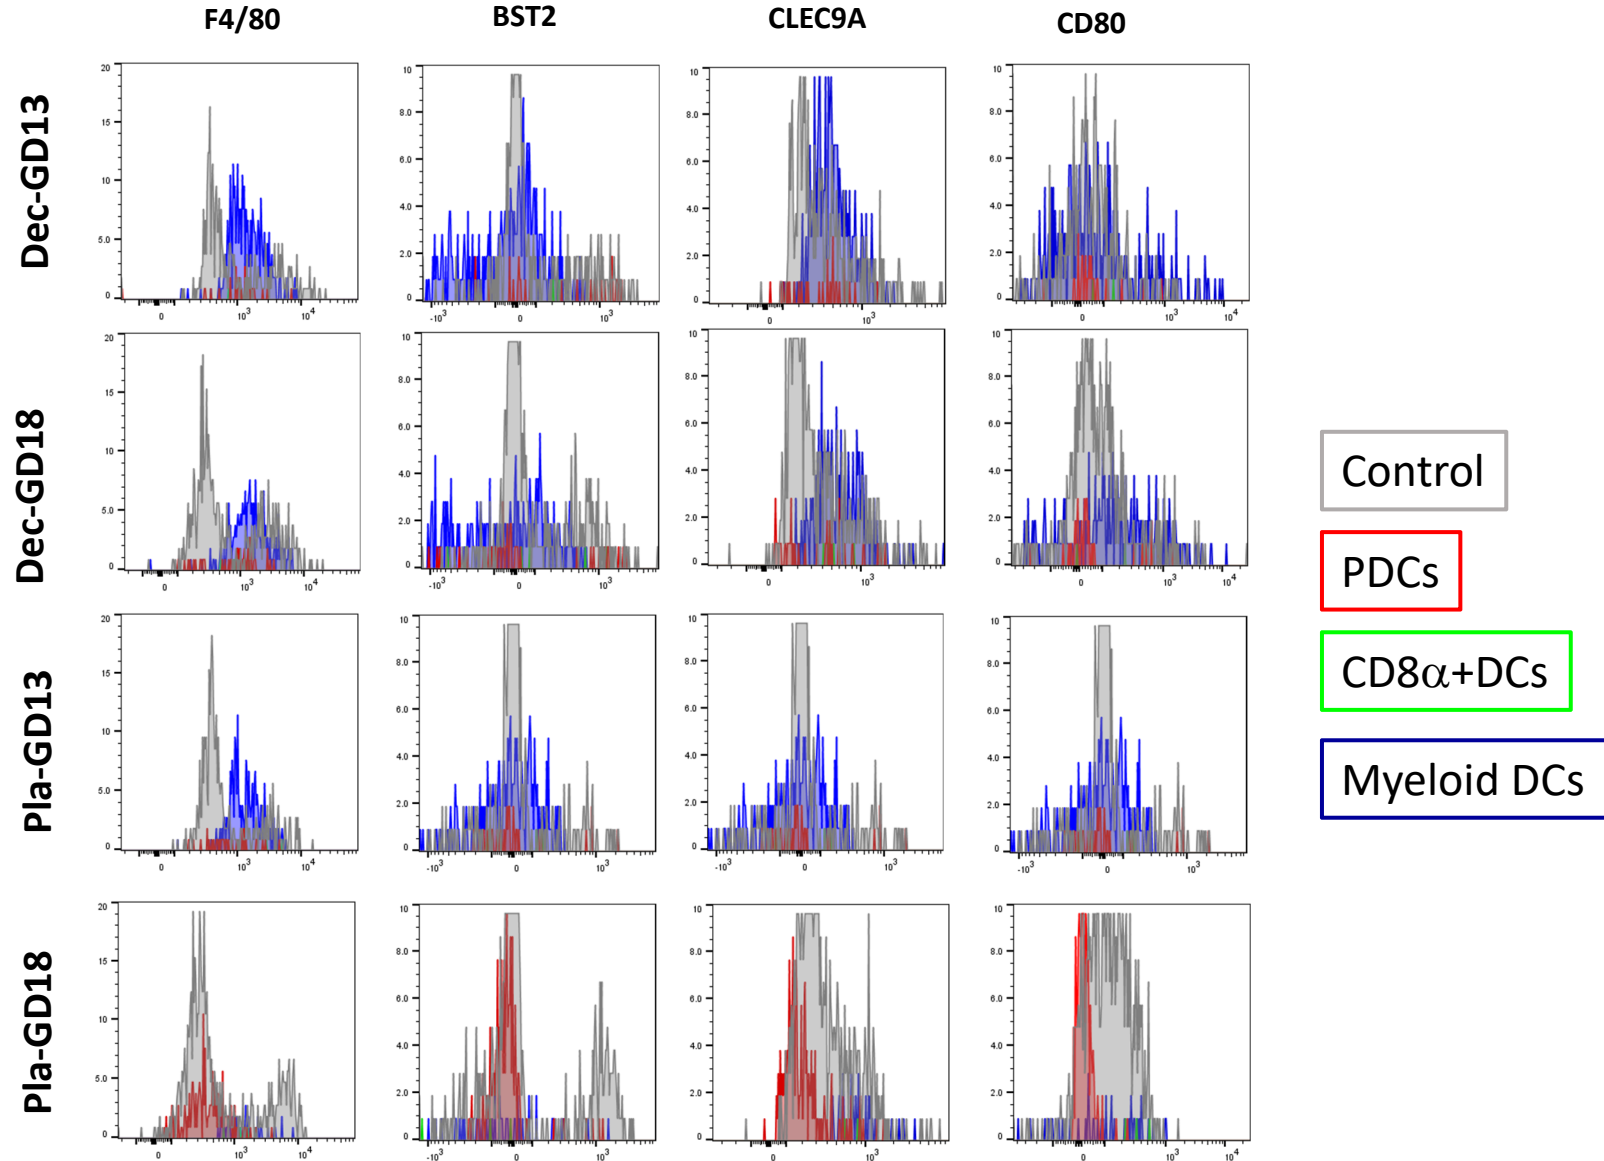

**Supplementary FIGURE 2** | Comparison of surface makers (F4/80, BST2, CLEC9A, and CD80) expression among PDCs, CD8 $\alpha$ + DCs, and myeloid DCs population in murine spleen, Peyer's patches, thymus, virgin uterus, decidua and placenta across pregnancy. NK1.1-/CD3- population used as control. 7

# Supplementary FIGURE. 3

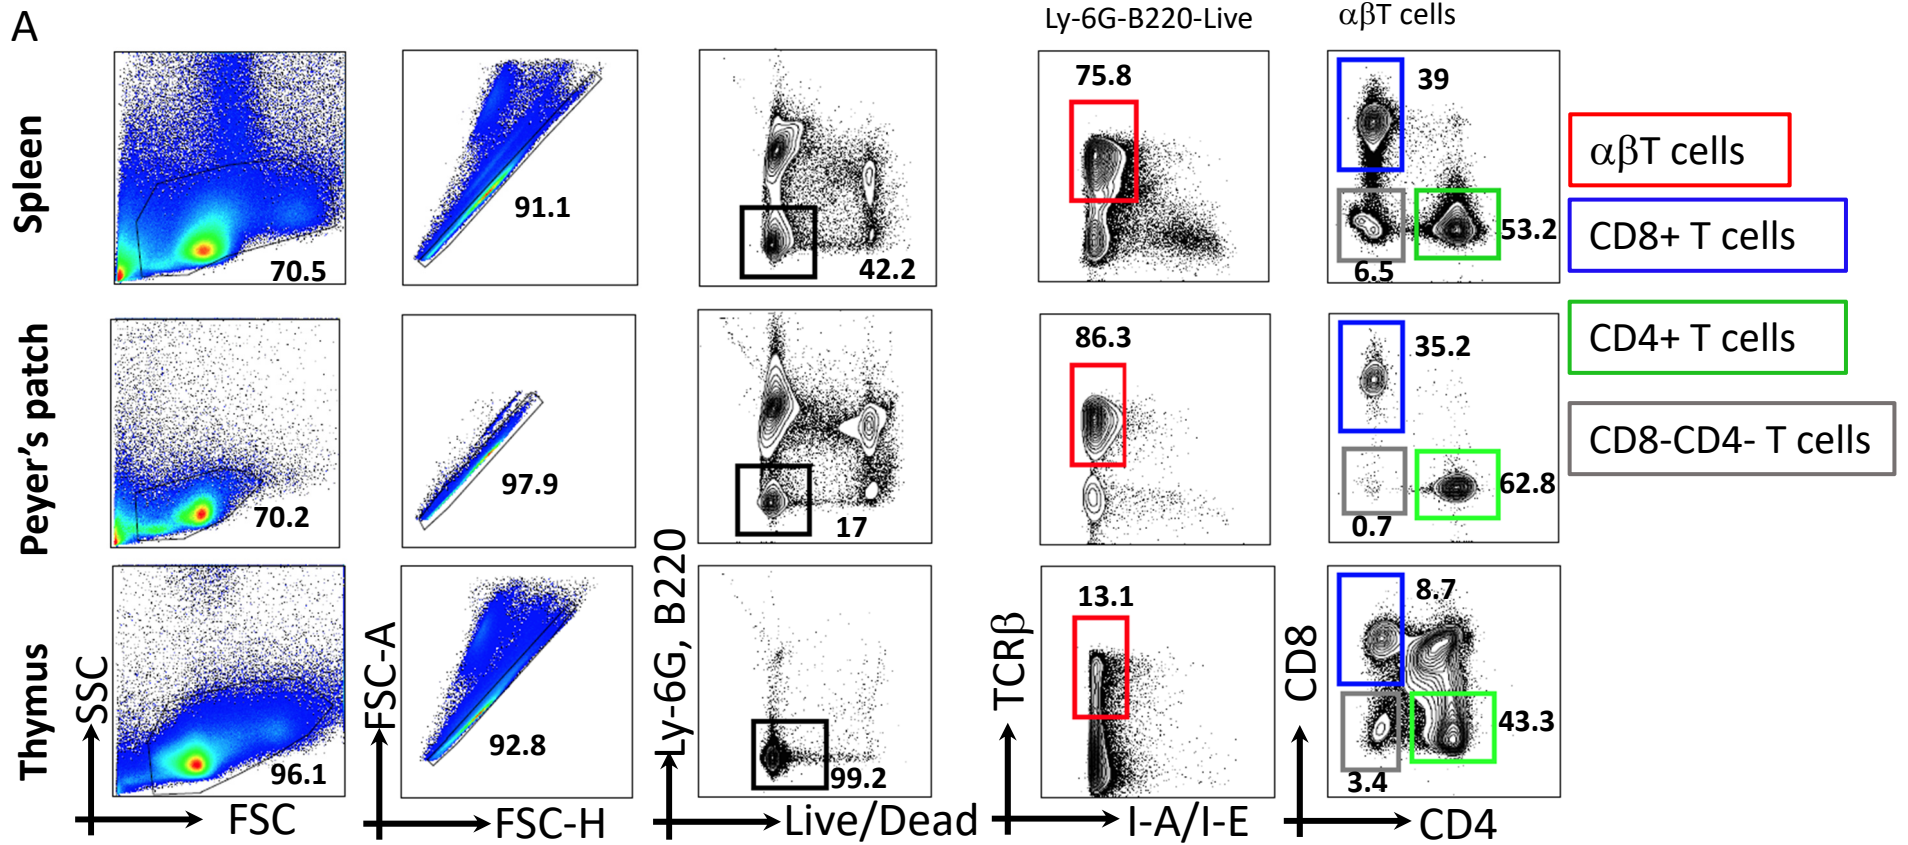

# Supplementary FIGURE. 3

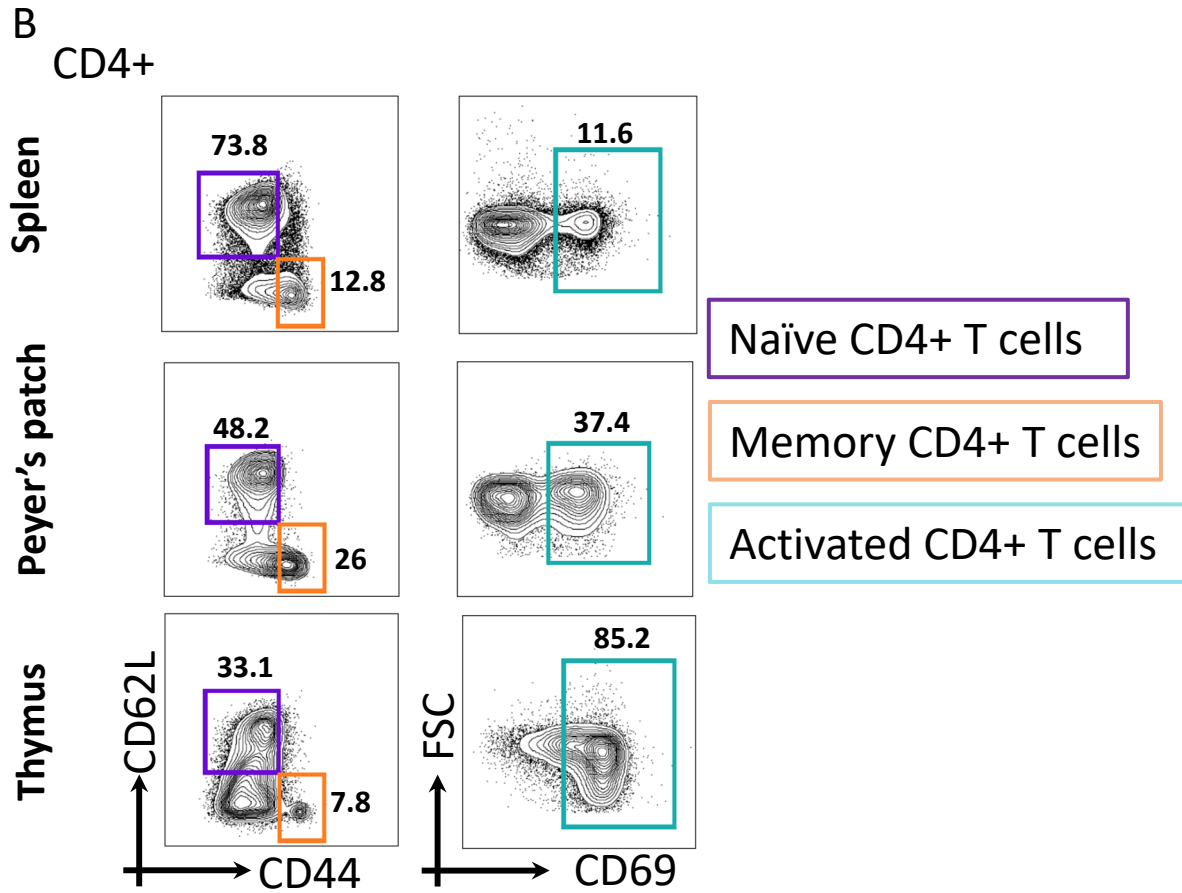

Supplementary FIGURE. 3

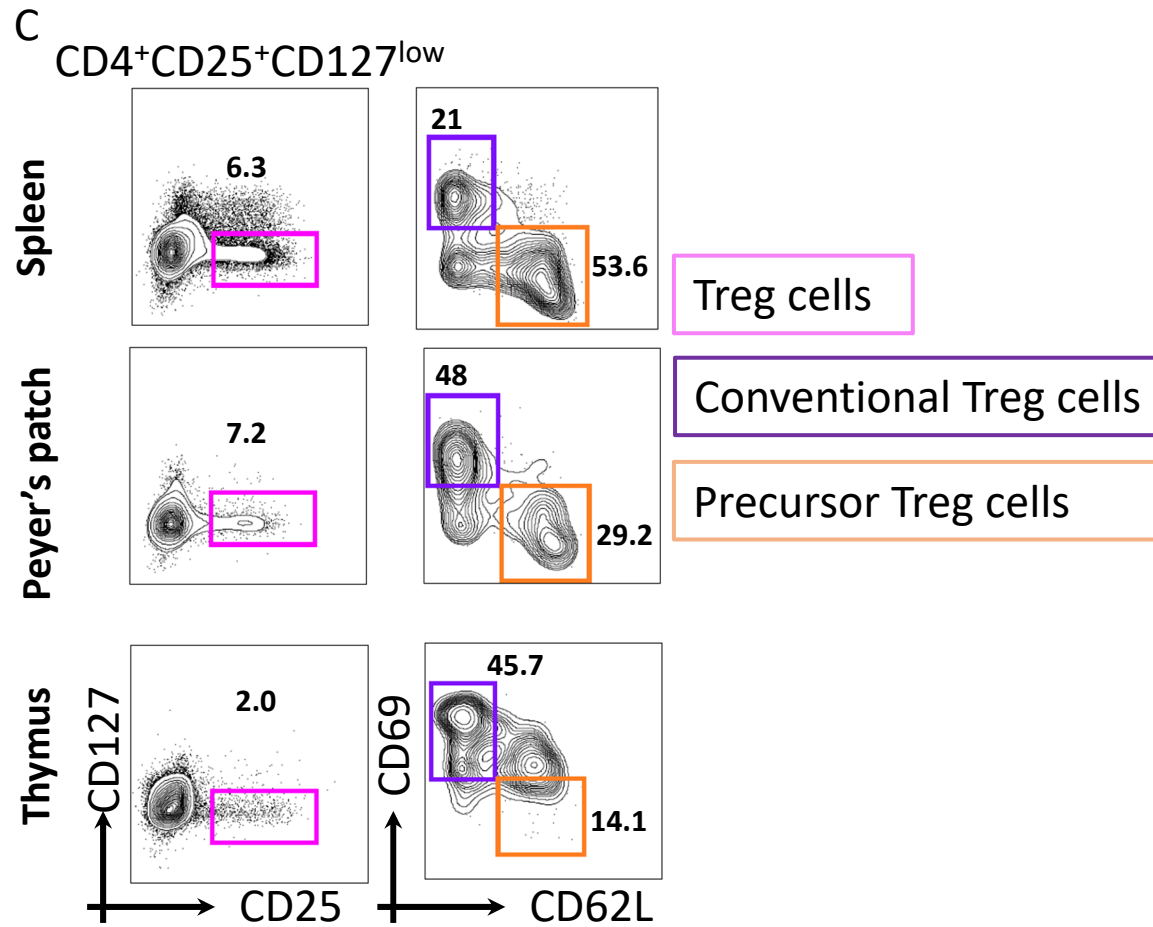

Supplementary FIGURE. 3

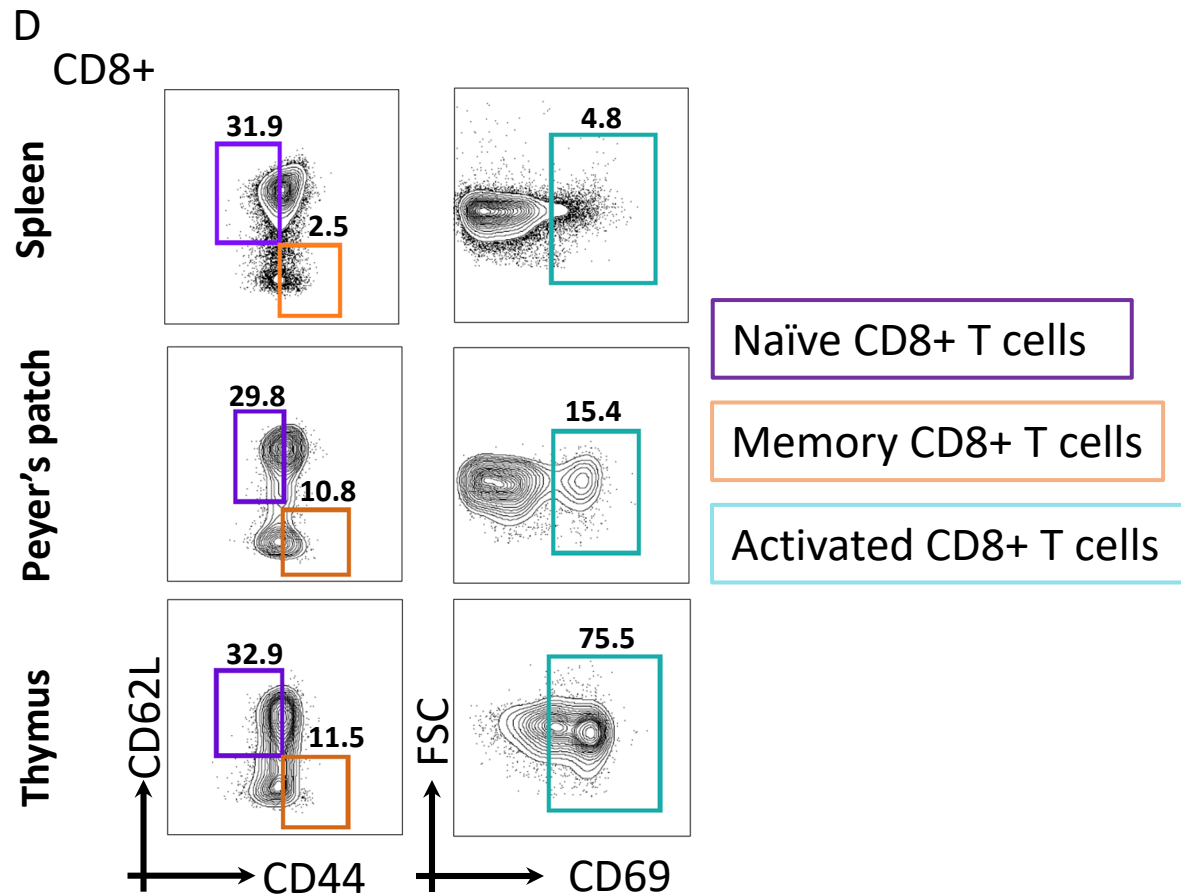

**Supplementary FIGURE 3** | Flow cytometry gating strategy of T cells in spleen, Peyer's patches, and thymus. **(A)** Gating strategy of CD4+, CD8+ and CD8-CD4- T cells (pregated on lin2-: Ly6G<sup>neg</sup>B220<sup>neg</sup>I-A/I-E<sup>neg</sup>, TCRβ<sup>+</sup>). **(B)** Gating strategy of subsets of CD4+ T cell subsets. **(C)** Gating strategy of Treg cells and its subsets, conventional and precursor Treg cells. **(D)** Gating strategy of CD8+ T cell subsets.

Supplementary FIGURE 4

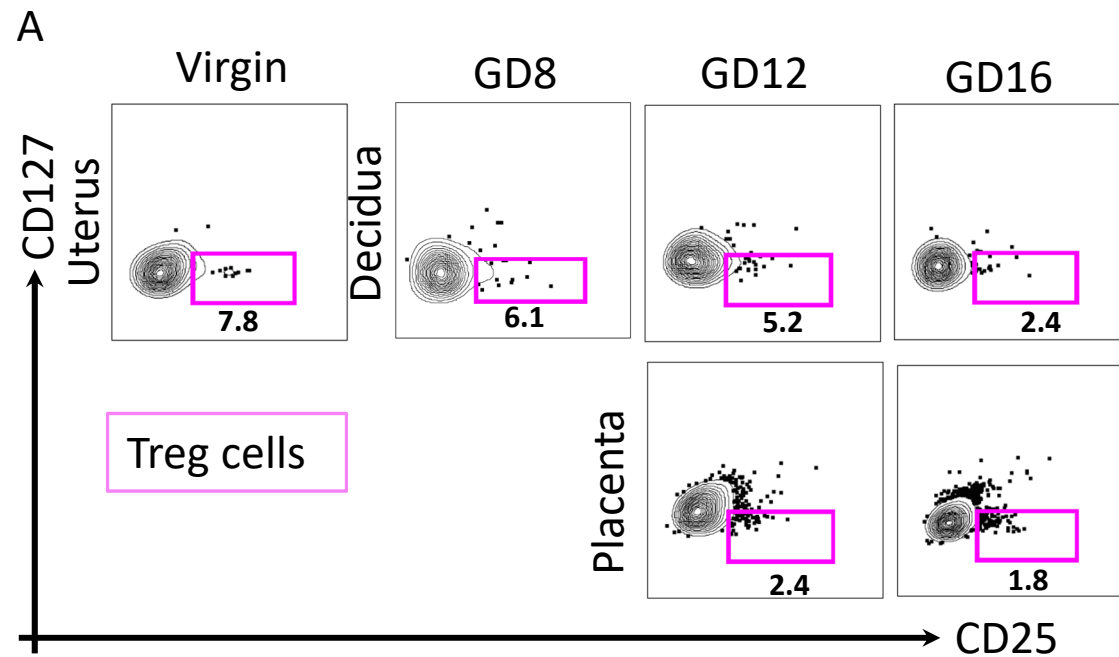



## Supplementary FIGURE 4

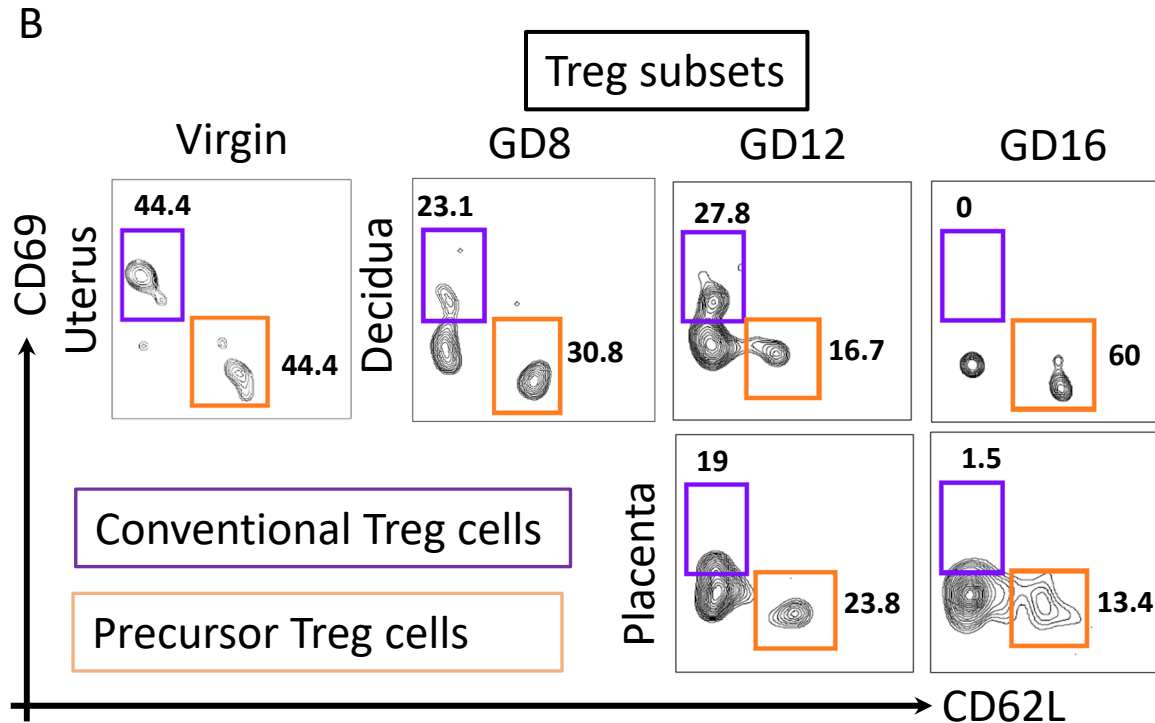

**Supplementary FIGURE 4** | Gating strategy of Treg cells and subsets in murine virgin uterus, decidua and placenta across pregnancy. **(A and B)** Treg cells were defined as  $\text{lin}2\text{-TCR}\beta^+\text{CD}4^+\text{CD}25^+\text{CD}127^{\text{low}}$ , conventional Treg cells and precursor Treg cells were defined as  $\text{CD}69^+\text{CD}62\text{L}^{\text{neg}}$  and  $\text{CD}69^{\text{neg}}\text{CD}62\text{L}^+$ , respectively.

Supplementary FIGURE 5

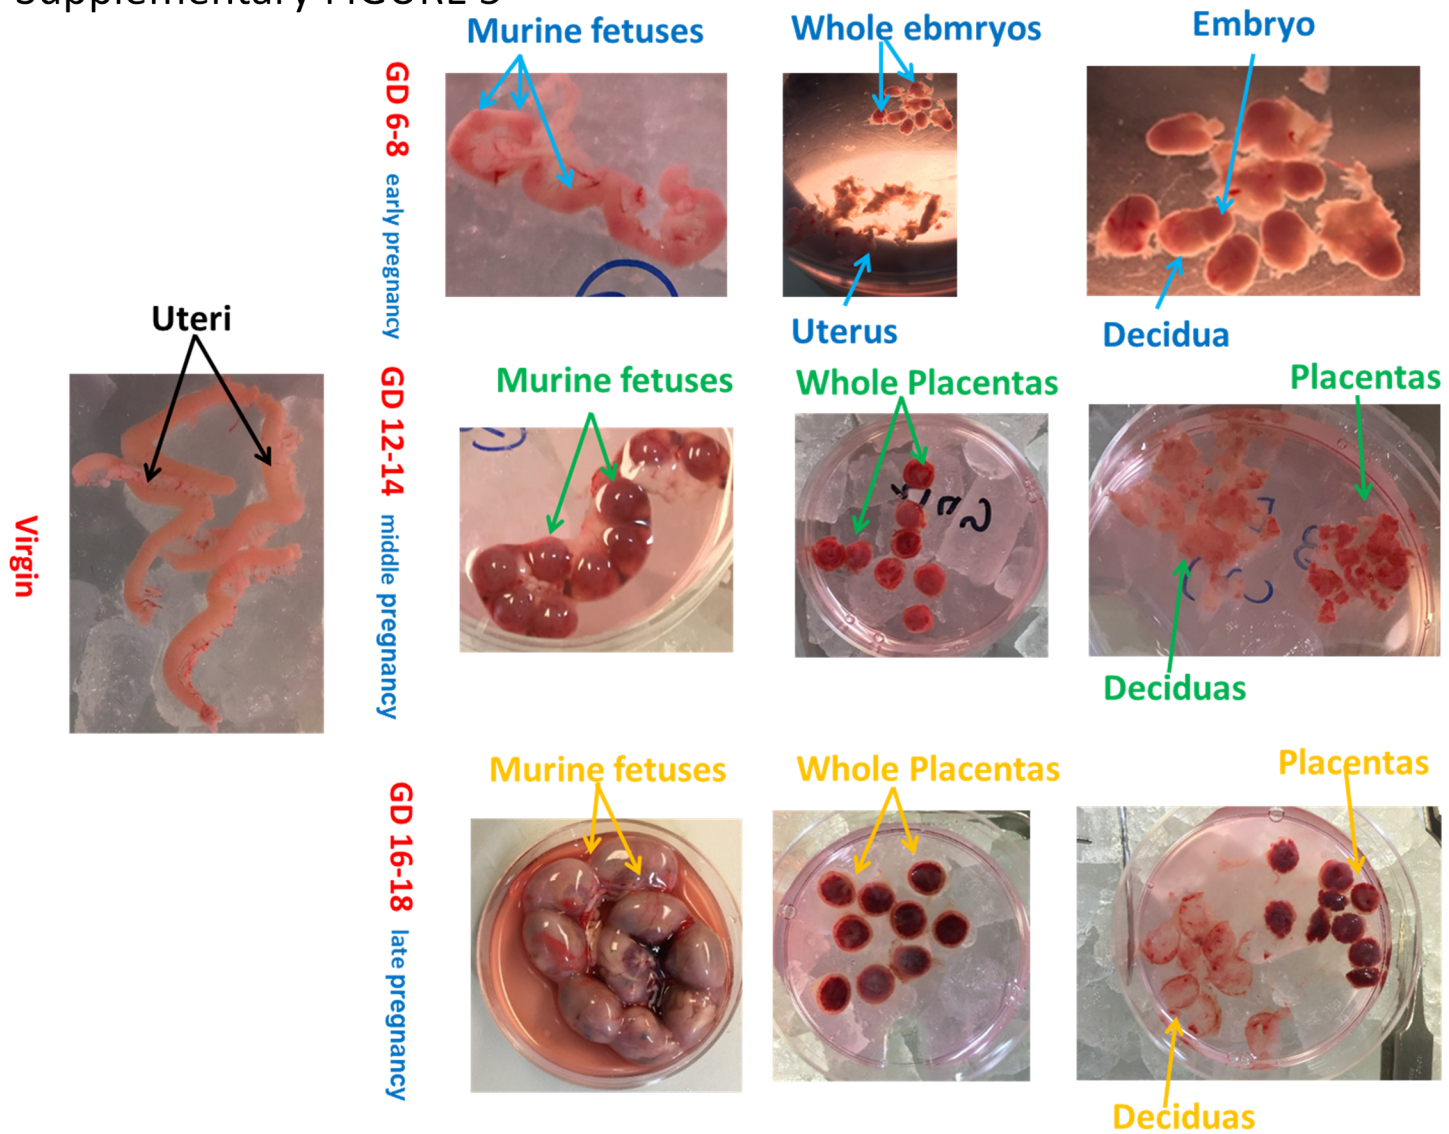

**Supplementary FIGURE 5** | Representative pictures of tissue dissection for murine uteri (virgin), embryos (GD6-8), decidua and placenta at GD6-8 (early pregnancy), 12-14 (middle pregnancy), 16-18 (late pregnancy).

**Supplementary Table 1: Groups of I-A/I-E<sup>+</sup> clusters (Figure 6B)**

| <b>Group</b> | <b>Clusters</b> | <b>Characterization</b>                                                                                                                            |
|--------------|-----------------|----------------------------------------------------------------------------------------------------------------------------------------------------|
| A            | 1, 2, 4, 5      | High to median levels of CLEC9A, CD209, CD80, lower to median levels of BST2, B220, CD14, CD8a, and varied CD11b, F4/80, CD11c                     |
| B            | 7, 8, 11, 14    | High expression of BST2, B220, CD14, median expression of CD209 and CD80, low expression of CD8a, CLEC9A, varied expression of CD11b, F4/80, CD11c |
| C            | 9               | High expression of BST2, B220, CD14, median expression of CD80, low expression of CD8a, CLEC9A, CD209, CD11b, F4/80, CD11c                         |
| D            | 10, 12, 13, 15  | High expression of BST2, B220, CD14, CLEC9A, CD209, median expression of CD80, low expression of CD11b, varied expression of F4/80 and CD11c       |
| E            | 3, 6            | High expression of CD11c, F4/80, CD11b, CLEC9A, CD209, low expression of CD14, CD8a, CD80, B220, and varied expression of BST2                     |
| F            | 16              | High expression of CD8a, CD14, CD209, median expressions of BST2, B220, CD80, low expressions of CD11c, F4/80, CD11b, CLEC9A.                      |

**Supplementary Table 2: Groups of TCR $\beta$ <sup>+</sup> clusters (Figure 7B)**

| <b>Group</b> | <b>Clusters</b> | <b>Characterization</b>                                                                                                                              |
|--------------|-----------------|------------------------------------------------------------------------------------------------------------------------------------------------------|
| A            | 1, 2,           | High expressions of CD44, CD8a, CD62L, low expressions of CD4, CD127, CD25, CD196, CD69, and high or low expression of CD122.                        |
| B            | 3, 5, 8         | High to median expressions of CD196, CD122, low expressions of CD4, CD62L, CD127, CD25, and varied expressions of CD8a and CD44, CD196.              |
| C            | 9, 13           | High expression of CD4, CD44, median expression of CD122, and low expression of CD8a, CD62L, CD127, CD25, CD196, CD69.                               |
| D            | 4, 6            | High expressions of CD4 and CD62L, median expression of CD122, low expression of CD44, CD8a, CD127, CD25, CD69, and high or low expression of CD196. |
| E            | 7, 10, 11, 12   | High to median expressions of CD127, CD25, CD196, CD69, CD122, low expressions of CD4, CD8a, CD62L, and high or low expression of CD44.              |

**Supplementary Table 3: Number of animals in each figure.**

| Figures\Tissues                     | # of Animals |                  |                    |                    |                     |                     |        |
|-------------------------------------|--------------|------------------|--------------------|--------------------|---------------------|---------------------|--------|
|                                     | Virgin       | Decidua<br>GD6-8 | Decidua<br>GD12-14 | Decidua<br>GD16-18 | Placenta<br>GD12-14 | Placenta<br>GD16-18 | Embryo |
| Fig. 1D<br>(CD11c+I-A/I-E+DCs)      | 16           | 14               | 15                 | 15                 | 14                  | 15                  | 14     |
| Fig. 1E<br>(Myeloid DCs)            | 16           | 14               | 15                 | 15                 | 15                  | 15                  | 14     |
| Fig. 1F<br>(CD8 $\alpha$ DCs)       | 15           | 14               | 15                 | 15                 | 15                  | 15                  | 14     |
| Fig. 2C<br>(Plasmacytoid DCs)       | 15           | 14               | 13                 | 15                 | 13                  | 15                  | 14     |
| Fig. 2D<br>(CD8 $\alpha$ -PDCs)     | 16           | 14               | 14                 | 16                 | 14                  | 16                  | 14     |
| Fig. 2E<br>(CD8 $\alpha$ +PDCs)     | 16           | 14               | 14                 | 16                 | 14                  | 16                  | 13     |
| Fig. 3D<br>( $\alpha\beta$ T cells) | 15           | 14               | 14                 | 11                 | 14                  | 11                  | 14     |
| Fig. 3E<br>(CD8+T cells)            | 15           | 14               | 14                 | 12                 | 13                  | 12                  | 14     |
| Fig. 3F<br>(CD4+ T cells)           | 15           | 14               | 14                 | 12                 | 14                  | 12                  | 14     |
| Fig. 3G<br>(CD4-CD8- T cells)       | 15           | 14               | 14                 | 12                 | 14                  | 12                  | 14     |
| Fig. 4C<br>(Naive CD4+ T cells)     | 15           | 14               | 14                 | 12                 | 13                  | 12                  | 14     |
| Fig. 4D<br>(Memory CD4+ T cells)    | 15           | 14               | 13                 | 12                 | 13                  | 12                  | 14     |
| Fig. 4E<br>(Activated CD4+ T cells) | 15           | 14               | 14                 | 12                 | 14                  | 12                  | 14     |
| Fig. 4F<br>(Treg cells)             | 15           | 14               | 13                 | 12                 | 13                  | 12                  | 14     |
| Fig. 4G<br>(Conv Treg cells)        | 14           | 14               | 11                 | 12                 | 10                  | 11                  | 14     |
| Fig. 4H<br>(Precursor Treg cells)   | 14           | 13               | 11                 | 13                 | 11                  | 13                  | 13     |
| Fig. 5C<br>(Naive CD8+ T cells)     | 15           | 14               | 14                 | 12                 | 14                  | 12                  | 13     |
| Fig. 5D<br>(Memory CD8+ T cells)    | 15           | 14               | 14                 | 12                 | 14                  | 12                  | 13     |
| Fig. 5E<br>(Activated CD8+ T cells) | 15           | 14               | 14                 | 12                 | 14                  | 11                  | 14     |

**Supplementary Table 4. Related to Figure 1.** Statistical comparisons for CD11c+I-A/I-E+DCs and subsets.

| Population                          | ANOVA                               |      |         | Tukey's post-hoc                      |                               |             |         |    |
|-------------------------------------|-------------------------------------|------|---------|---------------------------------------|-------------------------------|-------------|---------|----|
|                                     | F value                             | D.F  | p-value | Comparisons                           | p-value                       | Significant | Summary |    |
| CD11c+I-A/I-E+DCs (Fig. 1D)         | 15.3                                | 3,56 | <0.0001 | V. Uterus vs. Decidua GD6-8           | <0.0001                       | Yes         | ****    |    |
|                                     |                                     |      |         | V. Uterus vs. Decidua GD12-14         | 0.2634                        | No          | ns      |    |
|                                     |                                     |      |         | V. Uterus vs. Decidua GD16-18         | 0.9941                        | No          | ns      |    |
|                                     |                                     |      |         | Decidua GD6-8 vs. Decidua GD12-14     | 0.0005                        | Yes         | ***     |    |
|                                     |                                     |      |         | Decidua GD6-8 vs. Decidua GD16-18     | <0.0001                       | Yes         | ****    |    |
|                                     |                                     |      |         | Decidua GD12-14 vs. Decidua GD16-18   | 0.4065                        | No          | ns      |    |
|                                     | 16.9                                | 3,55 | <0.0001 | V. Uterus vs. Placenta GD12-14        | 0.8632                        | No          | ns      |    |
|                                     |                                     |      |         | V. Uterus vs. Placenta GD16-18        | 0.8866                        | No          | ns      |    |
|                                     |                                     |      |         | V. Uterus vs. Embryo GD6-8            | <0.0001                       | Yes         | ****    |    |
|                                     |                                     |      |         | Placenta GD12-14 vs. Placenta GD16-18 | 0.9999                        | No          | ns      |    |
|                                     |                                     |      |         | Placenta GD12-14 vs. Embryo GD6-8     | <0.0001                       | Yes         | ****    |    |
|                                     |                                     |      |         | Placenta GD16-18 vs. Embryo GD6-8     | <0.0001                       | Yes         | ****    |    |
|                                     | Myeloid DCs (Fig. 1E)               | 7.5  | 3,56    | 0.0003                                | V. Uterus vs. Decidua GD6-8   | 0.03        | Yes     | *  |
|                                     |                                     |      |         |                                       | V. Uterus vs. Decidua GD12-14 | 0.9951      | No      | ns |
| V. Uterus vs. Decidua GD16-18       |                                     |      |         |                                       | 0.0039                        | Yes         | **      |    |
| Decidua GD6-8 vs. Decidua GD12-14   |                                     |      |         |                                       | 0.0183                        | Yes         | *       |    |
| Decidua GD6-8 vs. Decidua GD16-18   |                                     |      |         |                                       | 0.9128                        | No          | ns      |    |
| Decidua GD12-14 vs. Decidua GD16-18 |                                     |      |         |                                       | 0.0022                        | Yes         | **      |    |
| 5.7                                 |                                     | 3,56 | 0.0018  | V. Uterus vs. Placenta GD12-14        | 0.4478                        | No          | ns      |    |
|                                     |                                     |      |         | V. Uterus vs. Placenta GD16-18        | 0.1488                        | No          | ns      |    |
|                                     |                                     |      |         | V. Uterus vs. Embryo GD6-8            | 0.0008                        | Yes         | ***     |    |
|                                     |                                     |      |         | Placenta GD12-14 vs. Placenta GD16-18 | 0.9151                        | No          | ns      |    |
|                                     |                                     |      |         | Placenta GD12-14 vs. Embryo GD6-8     | 0.061                         | No          | ns      |    |
|                                     |                                     |      |         | Placenta GD16-18 vs. Embryo GD6-8     | 0.2292                        | No          | ns      |    |
| CD8αDCs (Fig. 1F)                   |                                     | 1.5  | 3,55    | 0.2234                                | V. Uterus vs. Decidua GD6-8   | 0.404       | No      | ns |
|                                     |                                     |      |         |                                       | V. Uterus vs. Decidua GD12-14 | 0.9842      | No      | ns |
|                                     | V. Uterus vs. Decidua GD16-18       |      |         |                                       | 0.9995                        | No          | ns      |    |
|                                     | Decidua GD6-8 vs. Decidua GD12-14   |      |         |                                       | 0.2314                        | No          | ns      |    |
|                                     | Decidua GD6-8 vs. Decidua GD16-18   |      |         |                                       | 0.3432                        | No          | ns      |    |
|                                     | Decidua GD12-14 vs. Decidua GD16-18 |      |         |                                       | 0.9949                        | No          | ns      |    |
|                                     | 1.1                                 | 3,55 | 0.3743  | V. Uterus vs. Placenta GD12-14        | 0.9296                        | No          | ns      |    |
|                                     |                                     |      |         | V. Uterus vs. Placenta GD16-18        | 0.536                         | No          | ns      |    |
|                                     |                                     |      |         | V. Uterus vs. Embryo GD6-8            | 0.989                         | No          | ns      |    |
|                                     |                                     |      |         | Placenta GD12-14 vs. Placenta GD16-18 | 0.8793                        | No          | ns      |    |
|                                     |                                     |      |         | Placenta GD12-14 vs. Embryo GD6-8     | 0.7989                        | No          | ns      |    |
|                                     |                                     |      |         | Placenta GD16-18 vs. Embryo GD6-8     | 0.3645                        | No          | ns      |    |

**Supplementary Table 5. Related to Figure 2.** Statistical comparisons for Plasmacytoid DCs and subsets.

| Population                   | ANOVA   |      |                   | Tukey's post-hoc                      |                   |             |             |
|------------------------------|---------|------|-------------------|---------------------------------------|-------------------|-------------|-------------|
|                              | F value | D.F  | p-value           | Comparisons                           | p-value           | Significant | Summary     |
| Plasmacytoid DCs (Fig. 2C)   | 10.03   | 3,53 | <b>&lt;0.0001</b> | V. Uterus vs. Decidua GD6-8           | <b>0.0012</b>     | <b>Yes</b>  | <b>**</b>   |
|                              |         |      |                   | V. Uterus vs. Decidua GD12-14         | <b>0.0108</b>     | <b>Yes</b>  | <b>*</b>    |
|                              |         |      |                   | V. Uterus vs. Decidua GD16-18         | <b>&lt;0.0001</b> | <b>Yes</b>  | <b>****</b> |
|                              |         |      |                   | Decidua GD6-8 vs. Decidua GD12-14     | 0.9123            | No          | ns          |
|                              |         |      |                   | Decidua GD6-8 vs. Decidua GD16-18     | 0.6595            | No          | ns          |
|                              |         |      |                   | Decidua GD12-14 vs. Decidua GD16-18   | 0.2857            | No          | ns          |
|                              | 3.557   | 3,53 | <b>0.0202</b>     | V. Uterus vs. Placenta GD12-14        | 0.1214            | No          | ns          |
|                              |         |      |                   | V. Uterus vs. Placenta GD16-18        | 0.1157            | No          | ns          |
|                              |         |      |                   | V. Uterus vs. Embryo GD6-8            | <b>0.017</b>      | <b>Yes</b>  | <b>*</b>    |
|                              |         |      |                   | Placenta GD12-14 vs. Placenta GD16-18 | >0.9999           | No          | ns          |
|                              |         |      |                   | Placenta GD12-14 vs. Embryo GD6-8     | 0.8776            | No          | ns          |
|                              |         |      |                   | Placenta GD16-18 vs. Embryo GD6-8     | 0.8377            | No          | ns          |
| CD8 $\alpha$ -PDCs (Fig. 2D) | 6.764   | 3,56 | <b>0.0006</b>     | V. Uterus vs. Decidua GD6-8           | 0.2949            | No          | ns          |
|                              |         |      |                   | V. Uterus vs. Decidua GD12-14         | 0.2765            | No          | ns          |
|                              |         |      |                   | V. Uterus vs. Decidua GD16-18         | 0.0992            | No          | ns          |
|                              |         |      |                   | Decidua GD6-8 vs. Decidua GD12-14     | <b>0.0053</b>     | <b>Yes</b>  | <b>**</b>   |
|                              |         |      |                   | Decidua GD6-8 vs. Decidua GD16-18     | 0.9605            | No          | ns          |
|                              |         |      |                   | Decidua GD12-14 vs. Decidua GD16-18   | <b>0.0008</b>     | <b>Yes</b>  | <b>***</b>  |
|                              | 8.201   | 3,56 | 0.0001            | V. Uterus vs. Placenta GD12-14        | <b>0.0165</b>     | <b>Yes</b>  | <b>*</b>    |
|                              |         |      |                   | V. Uterus vs. Placenta GD16-18        | 0.9152            | No          | ns          |
|                              |         |      |                   | V. Uterus vs. Embryo GD6-8            | 0.2047            | No          | ns          |
|                              |         |      |                   | Placenta GD12-14 vs. Placenta GD16-18 | 0.0791            | No          | ns          |
|                              |         |      |                   | Placenta GD12-14 vs. Embryo GD6-8     | <b>&lt;0.0001</b> | <b>Yes</b>  | <b>****</b> |
|                              |         |      |                   | Placenta GD16-18 vs. Embryo GD6-8     | 0.054             | No          | ns          |
| CD8 $\alpha$ +PDCs (Fig. 2E) | 3.593   | 3,56 | 0.019             | V. Uterus vs. Decidua GD6-8           | 0.8586            | No          | ns          |
|                              |         |      |                   | V. Uterus vs. Decidua GD12-14         | 0.087             | No          | ns          |
|                              |         |      |                   | V. Uterus vs. Decidua GD16-18         | 0.9997            | No          | ns          |
|                              |         |      |                   | Decidua GD6-8 vs. Decidua GD12-14     | <b>0.0157</b>     | <b>Yes</b>  | <b>*</b>    |
|                              |         |      |                   | Decidua GD6-8 vs. Decidua GD16-18     | 0.8166            | No          | ns          |
|                              |         |      |                   | Decidua GD12-14 vs. Decidua GD16-18   | 0.1052            | No          | ns          |
|                              | 9.748   | 3,55 | <b>&lt;0.0001</b> | V. Uterus vs. Placenta GD12-14        | <b>0.0003</b>     | <b>Yes</b>  | <b>***</b>  |
|                              |         |      |                   | V. Uterus vs. Placenta GD16-18        | <b>0.0302</b>     | <b>Yes</b>  | <b>*</b>    |
|                              |         |      |                   | V. Uterus vs. Embryo GD6-8            | 0.9817            | No          | ns          |
|                              |         |      |                   | Placenta GD12-14 vs. Placenta GD16-18 | 0.3938            | No          | ns          |
|                              |         |      |                   | Placenta GD12-14 vs. Embryo GD6-8     | <b>0.0002</b>     | <b>Yes</b>  | <b>***</b>  |
|                              |         |      |                   | Placenta GD16-18 vs. Embryo GD6-8     | <b>0.0167</b>     | <b>Yes</b>  | <b>*</b>    |

**Supplementary Table 6. Related to Figure 3.** Statistical comparisons for T cells and subsets.

| Population                        | ANOVA         |      |         | Tukey's post-hoc                      |                   |             |         |
|-----------------------------------|---------------|------|---------|---------------------------------------|-------------------|-------------|---------|
|                                   | F value       | D.F  | p-value | Comparisons                           | p-value           | Significant | Summary |
| $\alpha$ T cells (Fig. 3D)        | 18.06         | 3,50 | <0.0001 | V. Uterus vs. Decidua GD6-8           | 0.4731            | No          | ns      |
|                                   |               |      |         | V. Uterus vs. Decidua GD12-14         | <b>0.0473</b>     | Yes         | *       |
|                                   |               |      |         | V. Uterus vs. Decidua GD16-18         | <b>&lt;0.0001</b> | Yes         | ****    |
|                                   |               |      |         | Decidua GD6-8 vs. Decidua GD12-14     | <b>0.001</b>      | Yes         | ***     |
|                                   |               |      |         | Decidua GD6-8 vs. Decidua GD16-18     | <b>&lt;0.0001</b> | Yes         | ****    |
|                                   |               |      |         | Decidua GD12-14 vs. Decidua GD16-18   | <b>0.0207</b>     | Yes         | *       |
|                                   | 2.691         | 3,50 | 0.0561  | V. Uterus vs. Placenta GD12-14        | 0.4742            | No          | ns      |
|                                   |               |      |         | V. Uterus vs. Placenta GD16-18        | 0.8282            | No          | ns      |
|                                   |               |      |         | V. Uterus vs. Embryo GD6-8            | 0.6205            | No          | ns      |
|                                   |               |      |         | Placenta GD12-14 vs. Placenta GD16-18 | 0.1429            | No          | ns      |
|                                   |               |      |         | Placenta GD12-14 vs. Embryo GD6-8     | 0.0545            | No          | ns      |
| CD8+ T cells (Fig. 3E)            | 1.049         | 3,51 | 0.3788  | V. Uterus vs. Decidua GD6-8           | 0.4624            | No          | ns      |
|                                   |               |      |         | V. Uterus vs. Decidua GD12-14         | 0.9999            | No          | ns      |
|                                   |               |      |         | V. Uterus vs. Decidua GD16-18         | 0.8502            | No          | ns      |
|                                   |               |      |         | Decidua GD6-8 vs. Decidua GD12-14     | 0.4367            | No          | ns      |
|                                   |               |      |         | Decidua GD6-8 vs. Decidua GD16-18     | 0.9337            | No          | ns      |
|                                   |               |      |         | Decidua GD12-14 vs. Decidua GD16-18   | 0.8245            | No          | ns      |
|                                   | 2.507         | 3,50 | 0.0695  | V. Uterus vs. Placenta GD12-14        | 0.9431            | No          | ns      |
|                                   |               |      |         | V. Uterus vs. Placenta GD16-18        | <b>0.0563</b>     | No          | ns      |
|                                   |               |      |         | V. Uterus vs. Embryo GD6-8            | 0.5019            | No          | ns      |
|                                   |               |      |         | Placenta GD12-14 vs. Placenta GD16-18 | 0.2049            | No          | ns      |
|                                   |               |      |         | Placenta GD12-14 vs. Embryo GD6-8     | 0.8521            | No          | ns      |
| CD4+ T cells (Fig. 3F)            | 6.688         | 3,51 | 0.0007  | V. Uterus vs. Decidua GD6-8           | <b>0.0006</b>     | Yes         | ***     |
|                                   |               |      |         | V. Uterus vs. Decidua GD12-14         | <b>0.0218</b>     | Yes         | *       |
|                                   |               |      |         | V. Uterus vs. Decidua GD16-18         | <b>0.0136</b>     | Yes         | *       |
|                                   |               |      |         | Decidua GD6-8 vs. Decidua GD12-14     | 0.6295            | No          | ns      |
|                                   |               |      |         | Decidua GD6-8 vs. Decidua GD16-18     | 0.8246            | No          | ns      |
|                                   |               |      |         | Decidua GD12-14 vs. Decidua GD16-18   | 0.9912            | No          | ns      |
|                                   | 4.753         | 3,51 | 0.0053  | V. Uterus vs. Placenta GD12-14        | <b>0.006</b>      | Yes         | **      |
|                                   |               |      |         | V. Uterus vs. Placenta GD16-18        | 0.4409            | No          | ns      |
|                                   |               |      |         | V. Uterus vs. Embryo GD6-8            | <b>0.0264</b>     | Yes         | *       |
|                                   |               |      |         | Placenta GD12-14 vs. Placenta GD16-18 | 0.2966            | No          | ns      |
|                                   |               |      |         | Placenta GD12-14 vs. Embryo GD6-8     | 0.9516            | No          | ns      |
| CD8-CD4- T cells (Fig. 3G)        | 3.722         | 3,51 | 0.017   | V. Uterus vs. Decidua GD6-8           | 0.0665            | No          | ns      |
|                                   |               |      |         | V. Uterus vs. Decidua GD12-14         | <b>0.0306</b>     | Yes         | *       |
|                                   |               |      |         | V. Uterus vs. Decidua GD16-18         | 0.0527            | No          | ns      |
|                                   |               |      |         | Decidua GD6-8 vs. Decidua GD12-14     | 0.989             | No          | ns      |
|                                   |               |      |         | Decidua GD6-8 vs. Decidua GD16-18     | 0.9972            | No          | ns      |
|                                   |               |      |         | Decidua GD12-14 vs. Decidua GD16-18   | 0.9996            | No          | ns      |
|                                   | 6.148         | 3,51 | 0.0012  | V. Uterus vs. Placenta GD12-14        | <b>0.0008</b>     | Yes         | ***     |
|                                   |               |      |         | V. Uterus vs. Placenta GD16-18        | 0.4187            | No          | ns      |
|                                   |               |      |         | V. Uterus vs. Embryo GD6-8            | 0.7658            | No          | ns      |
|                                   |               |      |         | Placenta GD12-14 vs. Placenta GD16-18 | 0.0934            | No          | ns      |
|                                   |               |      |         | Placenta GD12-14 vs. Embryo GD6-8     | <b>0.0158</b>     | Yes         | *       |
| Placenta GD16-18 vs. Embryo GD6-8 | <b>0.9307</b> | No   | ns      |                                       |                   |             |         |



Supplementary Table 7. Related to Figure 4. Statistical comparisons for CD4+T cells and subsets.

| Population                        | ANOVA   |      |                   | Tukey's post-hoc                      |                   |             |         |
|-----------------------------------|---------|------|-------------------|---------------------------------------|-------------------|-------------|---------|
|                                   | F value | D.F  | p-value           | Comparisons                           | p-value           | Significant | Summary |
| Naïve CD4+ T cells (Fig. 4C)      | 3.212   | 3,51 | <b>0.0305</b>     | V. Uterus vs. Decidua GD6-8           | 0.6715            | No          | ns      |
|                                   |         |      |                   | V. Uterus vs. Decidua GD12-14         | 0.8036            | No          | ns      |
|                                   |         |      |                   | V. Uterus vs. Decidua GD16-18         | 0.2303            | No          | ns      |
|                                   |         |      |                   | Decidua GD6-8 vs. Decidua GD12-14     | 0.2013            | No          | ns      |
|                                   |         |      |                   | Decidua GD6-8 vs. Decidua GD16-18     | <b>0.023</b>      | Yes         | *       |
|                                   |         |      |                   | Decidua GD12-14 vs. Decidua GD16-18   | 0.7249            | No          | ns      |
|                                   | 11.79   | 3,50 | <b>&lt;0.0001</b> | V. Uterus vs. Placenta GD12-14        | <b>&lt;0.0001</b> | Yes         | ****    |
|                                   |         |      |                   | V. Uterus vs. Placenta GD16-18        | <b>0.0002</b>     | Yes         | ***     |
|                                   |         |      |                   | V. Uterus vs. Embryo GD6-8            | 0.5483            | No          | ns      |
|                                   |         |      |                   | Placenta GD12-14 vs. Placenta GD16-18 | 0.9979            | No          | ns      |
|                                   |         |      |                   | Placenta GD12-14 vs. Embryo GD6-8     | <b>0.0048</b>     | Yes         | **      |
|                                   |         |      |                   | Placenta GD16-18 vs. Embryo GD6-8     | <b>0.0101</b>     | Yes         | *       |
| Memory CD4+ T cells (Fig. 4D)     | 1.025   | 3,50 | 0.3895            | V. Uterus vs. Decidua GD6-8           | 0.9473            | No          | ns      |
|                                   |         |      |                   | V. Uterus vs. Decidua GD12-14         | 0.4986            | No          | ns      |
|                                   |         |      |                   | V. Uterus vs. Decidua GD16-18         | 0.993             | No          | ns      |
|                                   |         |      |                   | Decidua GD6-8 vs. Decidua GD12-14     | 0.8244            | No          | ns      |
|                                   |         |      |                   | Decidua GD6-8 vs. Decidua GD16-18     | 0.8625            | No          | ns      |
|                                   |         |      |                   | Decidua GD12-14 vs. Decidua GD16-18   | 0.3895            | No          | ns      |
|                                   | 4.106   | 3,50 | <b>0.0111</b>     | V. Uterus vs. Placenta GD12-14        | 0.329             | No          | ns      |
|                                   |         |      |                   | V. Uterus vs. Placenta GD16-18        | <b>0.0067</b>     | Yes         | **      |
|                                   |         |      |                   | V. Uterus vs. Embryo GD6-8            | 0.1137            | No          | ns      |
|                                   |         |      |                   | Placenta GD12-14 vs. Placenta GD16-18 | 0.342             | No          | ns      |
|                                   |         |      |                   | Placenta GD12-14 vs. Embryo GD6-8     | 0.9519            | No          | ns      |
|                                   |         |      |                   | Placenta GD16-18 vs. Embryo GD6-8     | 0.6307            | No          | ns      |
| Activated CD4+ T cells (Fig. 4E)  | 7.537   | 3,51 | <b>0.0003</b>     | V. Uterus vs. Decidua GD6-8           | 0.2566            | No          | ns      |
|                                   |         |      |                   | V. Uterus vs. Decidua GD12-14         | <b>0.0348</b>     | Yes         | *       |
|                                   |         |      |                   | V. Uterus vs. Decidua GD16-18         | <b>0.0001</b>     | Yes         | ***     |
|                                   |         |      |                   | Decidua GD6-8 vs. Decidua GD12-14     | 0.7916            | No          | ns      |
|                                   |         |      |                   | Decidua GD6-8 vs. Decidua GD16-18     | <b>0.033</b>      | Yes         | *       |
|                                   |         |      |                   | Decidua GD12-14 vs. Decidua GD16-18   | 0.2258            | No          | ns      |
|                                   | 37.71   | 3,51 | <b>&lt;0.0001</b> | V. Uterus vs. Placenta GD12-14        | <b>&lt;0.0001</b> | Yes         | ****    |
|                                   |         |      |                   | V. Uterus vs. Placenta GD16-18        | <b>&lt;0.0001</b> | Yes         | ****    |
|                                   |         |      |                   | V. Uterus vs. Embryo GD6-8            | <b>0.0002</b>     | Yes         | ***     |
|                                   |         |      |                   | Placenta GD12-14 vs. Placenta GD16-18 | 0.3431            | No          | ns      |
|                                   |         |      |                   | Placenta GD12-14 vs. Embryo GD6-8     | <b>0.0035</b>     | Yes         | **      |
|                                   |         |      |                   | Placenta GD16-18 vs. Embryo GD6-8     | <b>&lt;0.0001</b> | Yes         | ****    |
| Treg cells (Fig. 4F)              | 4.5     | 3,50 | <b>0.0072</b>     | V. Uterus vs. Decidua GD6-8           | 0.0784            | No          | ns      |
|                                   |         |      |                   | V. Uterus vs. Decidua GD12-14         | 0.1203            | No          | ns      |
|                                   |         |      |                   | V. Uterus vs. Decidua GD16-18         | <b>0.005</b>      | Yes         | **      |
|                                   |         |      |                   | Decidua GD6-8 vs. Decidua GD12-14     | 0.9988            | No          | ns      |
|                                   |         |      |                   | Decidua GD6-8 vs. Decidua GD16-18     | 0.666             | No          | ns      |
|                                   |         |      |                   | Decidua GD12-14 vs. Decidua GD16-18   | 0.5895            | No          | ns      |
|                                   | 9.191   | 3,50 | <b>&lt;0.0001</b> | V. Uterus vs. Placenta GD12-14        | <b>0.0001</b>     | Yes         | ***     |
|                                   |         |      |                   | V. Uterus vs. Placenta GD16-18        | <b>0.0005</b>     | Yes         | ***     |
|                                   |         |      |                   | V. Uterus vs. Embryo GD6-8            | <b>0.0264</b>     | Yes         | *       |
|                                   |         |      |                   | Placenta GD12-14 vs. Placenta GD16-18 | 0.9948            | No          | ns      |
|                                   |         |      |                   | Placenta GD12-14 vs. Embryo GD6-8     | 0.3059            | No          | ns      |
|                                   |         |      |                   | Placenta GD16-18 vs. Embryo GD6-8     | 0.4624            | No          | ns      |
| Conventional Treg cells (Fig. 4G) | 3.572   | 3,47 | <b>0.0208</b>     | V. Uterus vs. Decidua GD6-8           | 0.9826            | No          | ns      |
|                                   |         |      |                   | V. Uterus vs. Decidua GD12-14         | 0.8381            | No          | ns      |
|                                   |         |      |                   | V. Uterus vs. Decidua GD16-18         | <b>0.0203</b>     | Yes         | *       |
|                                   |         |      |                   | Decidua GD6-8 vs. Decidua GD12-14     | 0.9615            | No          | ns      |
|                                   |         |      |                   | Decidua GD6-8 vs. Decidua GD16-18     | <b>0.0493</b>     | Yes         | *       |
|                                   |         |      |                   | Decidua GD12-14 vs. Decidua GD16-18   | 0.1863            | No          | ns      |
|                                   | 19.25   | 3,45 | <b>&lt;0.0001</b> | V. Uterus vs. Placenta GD12-14        | <b>&lt;0.0001</b> | Yes         | ****    |
|                                   |         |      |                   | V. Uterus vs. Placenta GD16-18        | <b>&lt;0.0001</b> | Yes         | ****    |
|                                   |         |      |                   | V. Uterus vs. Embryo GD6-8            | <b>0.0378</b>     | Yes         | *       |
|                                   |         |      |                   | Placenta GD12-14 vs. Placenta GD16-18 | 0.9548            | No          | ns      |
|                                   |         |      |                   | Placenta GD12-14 vs. Embryo GD6-8     | <b>0.0084</b>     | Yes         | **      |
|                                   |         |      |                   | Placenta GD16-18 vs. Embryo GD6-8     | <b>0.0012</b>     | Yes         | **      |
| Precursor Treg cells (Fig. 4H)    | 2.492   | 3,47 | 0.0716            | V. Uterus vs. Decidua GD6-8           | 0.0941            | No          | ns      |
|                                   |         |      |                   | V. Uterus vs. Decidua GD12-14         | 0.4751            | No          | ns      |
|                                   |         |      |                   | V. Uterus vs. Decidua GD16-18         | 0.9976            | No          | ns      |
|                                   |         |      |                   | Decidua GD6-8 vs. Decidua GD12-14     | 0.847             | No          | ns      |
|                                   |         |      |                   | Decidua GD6-8 vs. Decidua GD16-18     | 0.1508            | No          | ns      |
|                                   |         |      |                   | Decidua GD12-14 vs. Decidua GD16-18   | 0.5994            | No          | ns      |
|                                   | 0.1348  | 3,47 | 0.9388            | V. Uterus vs. Placenta GD12-14        | 0.972             | No          | ns      |
|                                   |         |      |                   | V. Uterus vs. Placenta GD16-18        | 0.9943            | No          | ns      |
|                                   |         |      |                   | V. Uterus vs. Embryo GD6-8            | 0.9984            | No          | ns      |
|                                   |         |      |                   | Placenta GD12-14 vs. Placenta GD16-18 | 0.9975            | No          | ns      |
|                                   |         |      |                   | Placenta GD12-14 vs. Embryo GD6-8     | 0.9364            | No          | ns      |
|                                   |         |      |                   | Placenta GD16-18 vs. Embryo GD6-8     | 0.9765            | No          | ns      |

**Supplementary Table 8. Related to Figure 5.** Statistical comparisons for Plasmacytoid DCs and subsets.

| Population                     | ANOVA   |      |                   | Tukey's post-hoc                      |                   |             |         |
|--------------------------------|---------|------|-------------------|---------------------------------------|-------------------|-------------|---------|
|                                | F value | D.F  | p-value           | Comparisons                           | p-value           | Significant | Summary |
| Naïve CD8+ T cells (Fig. 5C)   | 4.651   | 3,51 | <b>0.006</b>      | V. Uterus vs. Decidua GD6-8           | 0.9349            | No          | ns      |
|                                |         |      |                   | V. Uterus vs. Decidua GD12-14         | 0.99              | No          | ns      |
|                                |         |      |                   | V. Uterus vs. Decidua GD16-18         | <b>0.0228</b>     | <b>Yes</b>  | *       |
|                                |         |      |                   | Decidua GD6-8 vs. Decidua GD12-14     | 0.8156            | No          | ns      |
|                                |         |      |                   | Decidua GD6-8 vs. Decidua GD16-18     | <b>0.0056</b>     | <b>Yes</b>  | **      |
|                                |         |      |                   | Decidua GD12-14 vs. Decidua GD16-18   | 0.0526            | No          | ns      |
|                                | 2.352   | 3,50 | 0.0834            | V. Uterus vs. Placenta GD12-14        | 0.4641            | No          | ns      |
|                                |         |      |                   | V. Uterus vs. Placenta GD16-18        | 0.155             | No          | ns      |
|                                |         |      |                   | V. Uterus vs. Embryo GD6-8            | 0.9995            | No          | ns      |
|                                |         |      |                   | Placenta GD12-14 vs. Placenta GD16-18 | 0.889             | No          | ns      |
|                                |         |      |                   | Placenta GD12-14 vs. Embryo GD6-8     | 0.4298            | No          | ns      |
|                                |         |      |                   | Placenta GD16-18 vs. Embryo GD6-8     | 0.1443            | No          | ns      |
| Memory CD8+ T cell (Fig. 5D)   | 3.177   | 3,51 | <b>0.0318</b>     | V. Uterus vs. Decidua GD6-8           | >0.9999           | No          | ns      |
|                                |         |      |                   | V. Uterus vs. Decidua GD12-14         | 0.8854            | No          | ns      |
|                                |         |      |                   | V. Uterus vs. Decidua GD16-18         | <b>0.0436</b>     | <b>Yes</b>  | *       |
|                                |         |      |                   | Decidua GD6-8 vs. Decidua GD12-14     | 0.8707            | No          | ns      |
|                                |         |      |                   | Decidua GD6-8 vs. Decidua GD16-18     | <b>0.0433</b>     | <b>Yes</b>  | *       |
|                                |         |      |                   | Decidua GD12-14 vs. Decidua GD16-18   | 0.2081            | No          | ns      |
|                                | 13.2    | 3,50 | <b>&lt;0.0001</b> | V. Uterus vs. Placenta GD12-14        | <b>&lt;0.0001</b> | <b>Yes</b>  | ****    |
|                                |         |      |                   | V. Uterus vs. Placenta GD16-18        | <b>&lt;0.0001</b> | <b>Yes</b>  | ****    |
|                                |         |      |                   | V. Uterus vs. Embryo GD6-8            | <b>0.0107</b>     | <b>Yes</b>  | *       |
|                                |         |      |                   | Placenta GD12-14 vs. Placenta GD16-18 | 0.9952            | No          | ns      |
|                                |         |      |                   | Placenta GD12-14 vs. Embryo GD6-8     | 0.2104            | No          | ns      |
|                                |         |      |                   | Placenta GD16-18 vs. Embryo GD6-8     | 0.1558            | No          | ns      |
| Activated CD8+ T cell(Fig. 5E) | 5.465   | 3,50 | <b>0.0025</b>     | V. Uterus vs. Decidua GD6-8           | 0.7397            | No          | ns      |
|                                |         |      |                   | V. Uterus vs. Decidua GD12-14         | 0.7536            | No          | ns      |
|                                |         |      |                   | V. Uterus vs. Decidua GD16-18         | <b>0.0017</b>     | <b>Yes</b>  | **      |
|                                |         |      |                   | Decidua GD6-8 vs. Decidua GD12-14     | >0.9999           | No          | ns      |
|                                |         |      |                   | Decidua GD6-8 vs. Decidua GD16-18     | <b>0.0279</b>     | <b>Yes</b>  | *       |
|                                |         |      |                   | Decidua GD12-14 vs. Decidua GD16-18   | <b>0.0263</b>     | <b>Yes</b>  | *       |
|                                | 19.85   | 3,49 | <b>&lt;0.0001</b> | V. Uterus vs. Placenta GD12-14        | <b>0.0001</b>     | <b>Yes</b>  | ***     |
|                                |         |      |                   | V. Uterus vs. Placenta GD16-18        | <b>&lt;0.0001</b> | <b>Yes</b>  | ****    |
|                                |         |      |                   | V. Uterus vs. Embryo GD6-8            | 0.0916            | No          | ns      |
|                                |         |      |                   | Placenta GD12-14 vs. Placenta GD16-18 | <b>0.02</b>       | <b>Yes</b>  | *       |
|                                |         |      |                   | Placenta GD12-14 vs. Embryo GD6-8     | 0.1243            | No          | ns      |
|                                |         |      |                   | Placenta GD16-18 vs. Embryo GD6-8     | <b>&lt;0.0001</b> | <b>Yes</b>  | ****    |
